# Supplementary material
Source: PubMed Central journal article supplement (PMC9012003)

# Extended data 1c

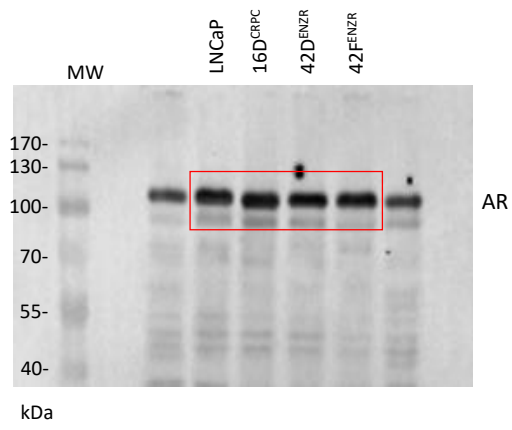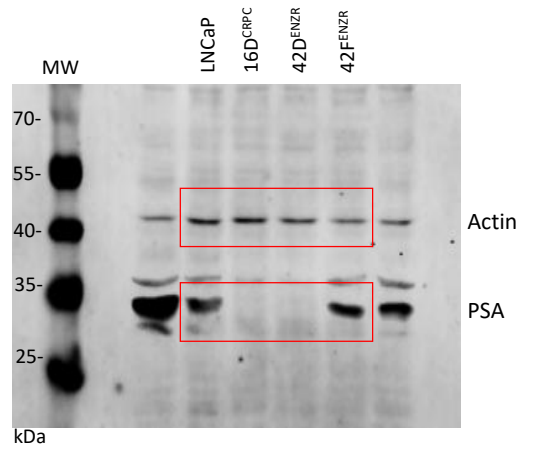

Supplement: NIHMS1789005-supplement-Ex_Fig__1_gel.pdf [file NIHMS1789005-supplement-Ex_Fig__1_gel.pdf]

**Figure 2b**

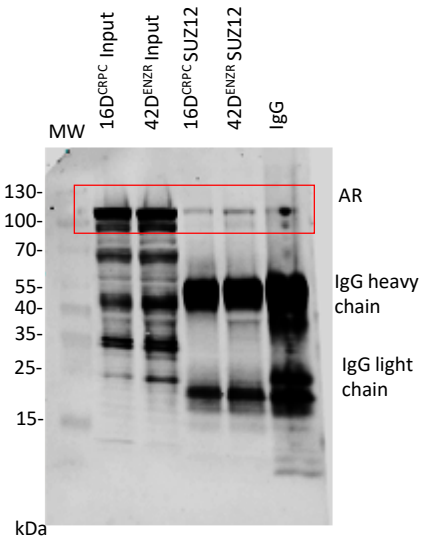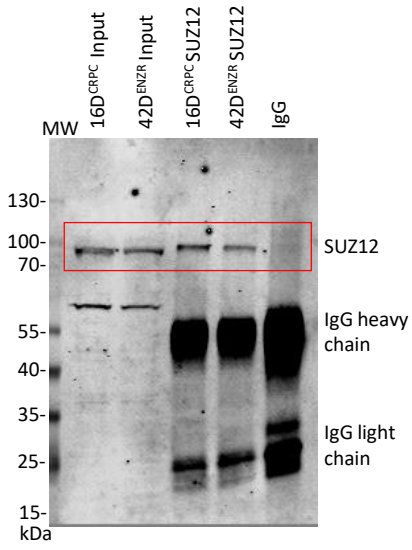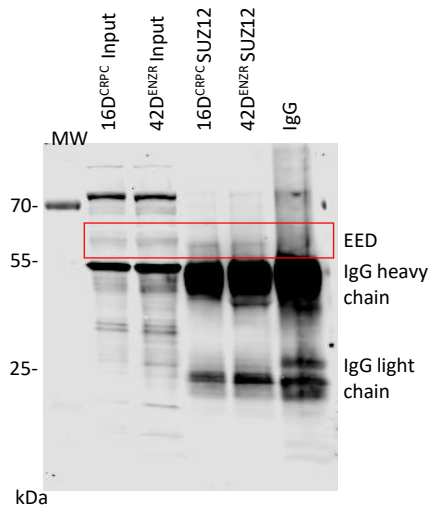

Supplement: NIHMS1789005-supplement-Fig__2_gel.pdf [file NIHMS1789005-supplement-Fig__2_gel.pdf]

**Figure 4a**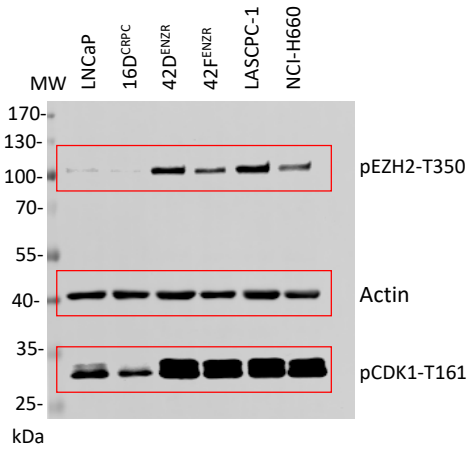**Figure 4b**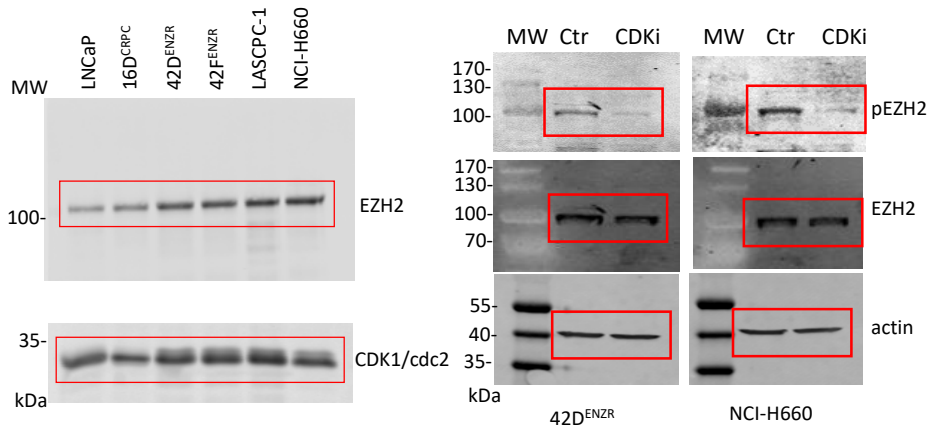**Figure 4e**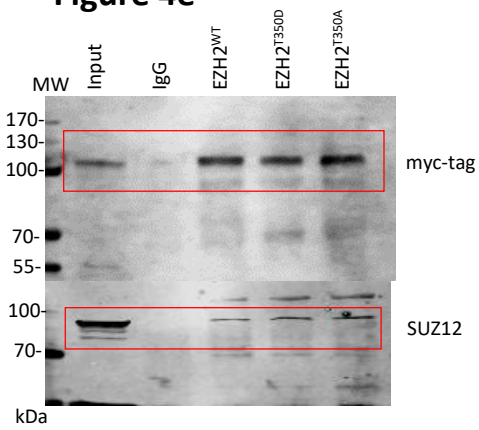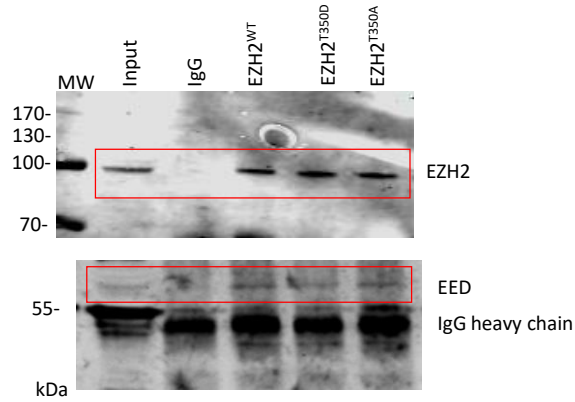**Figure 4i**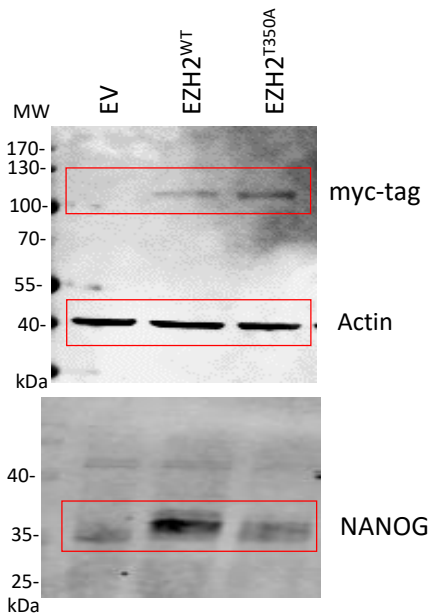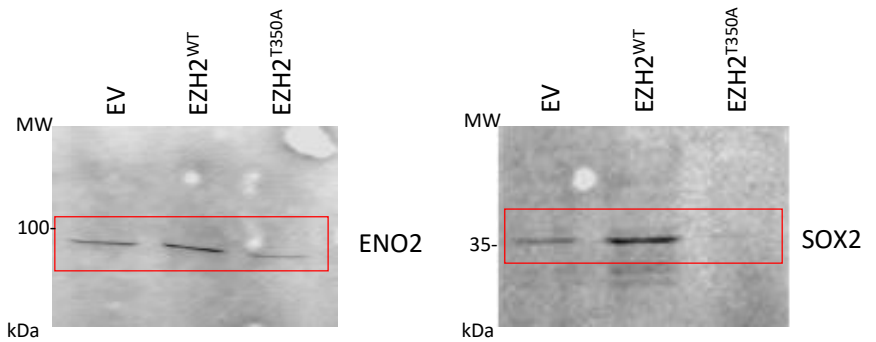

Supplement: NIHMS1789005-supplement-Fig__4_gel.pdf [file NIHMS1789005-supplement-Fig__4_gel.pdf]
